# Supplementary material for: Dynamics of water fluxes and storages in an Alpine karst catchment under current and potential future climate conditions
Source: Copernicus journal article supplement (doi:10.5194/hess-2017-216), 2017-05-08
Supplement: Supplementary file 1 [file hess-2017-216-supplement.pdf]

Fig. S1

Estimated FDC of QS [ $\text{m}^3/\text{s}$ ]

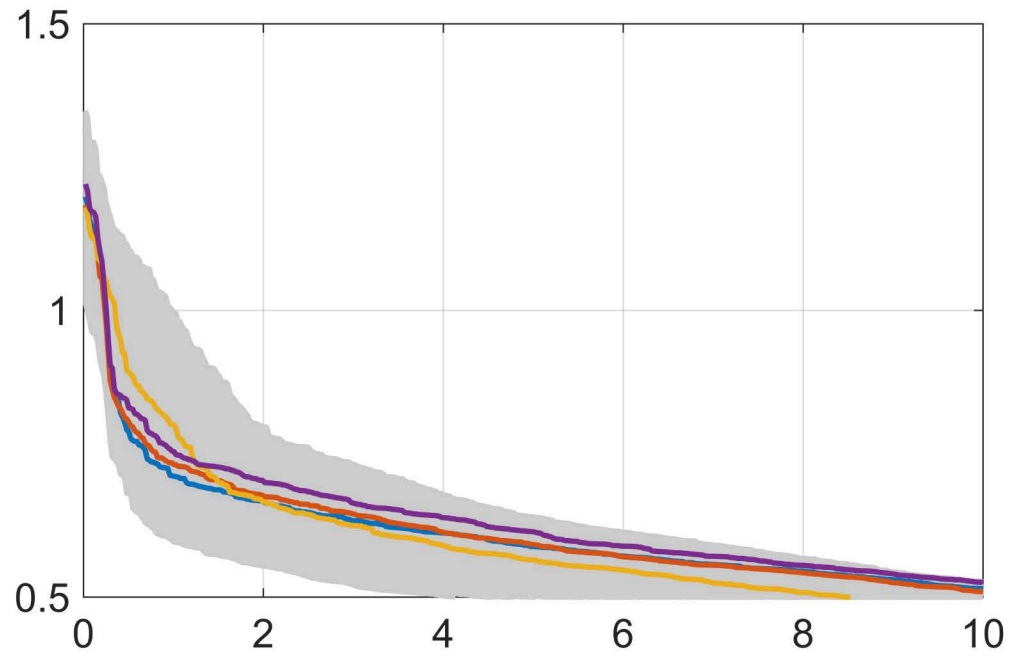

Estimated FDC of QA [ $\text{m}^3/\text{s}$ ]

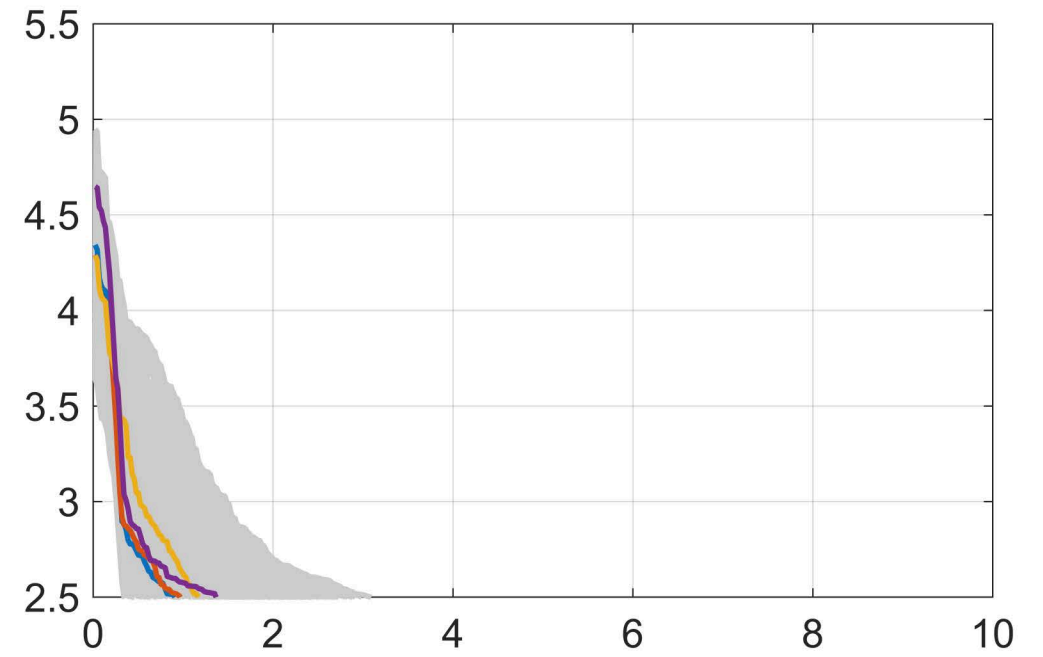

Estimated FDC of QE [ $\text{m}^3/\text{s}$ ]

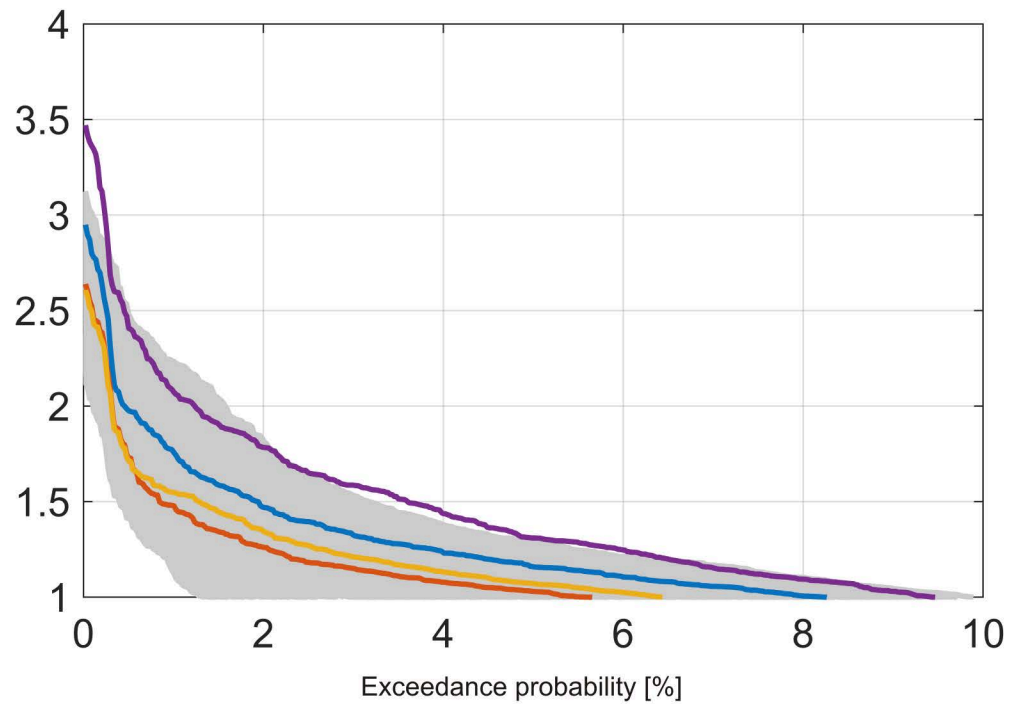

Estimated FDC of surface runoff [ $\text{m}^3/\text{s}$ ]

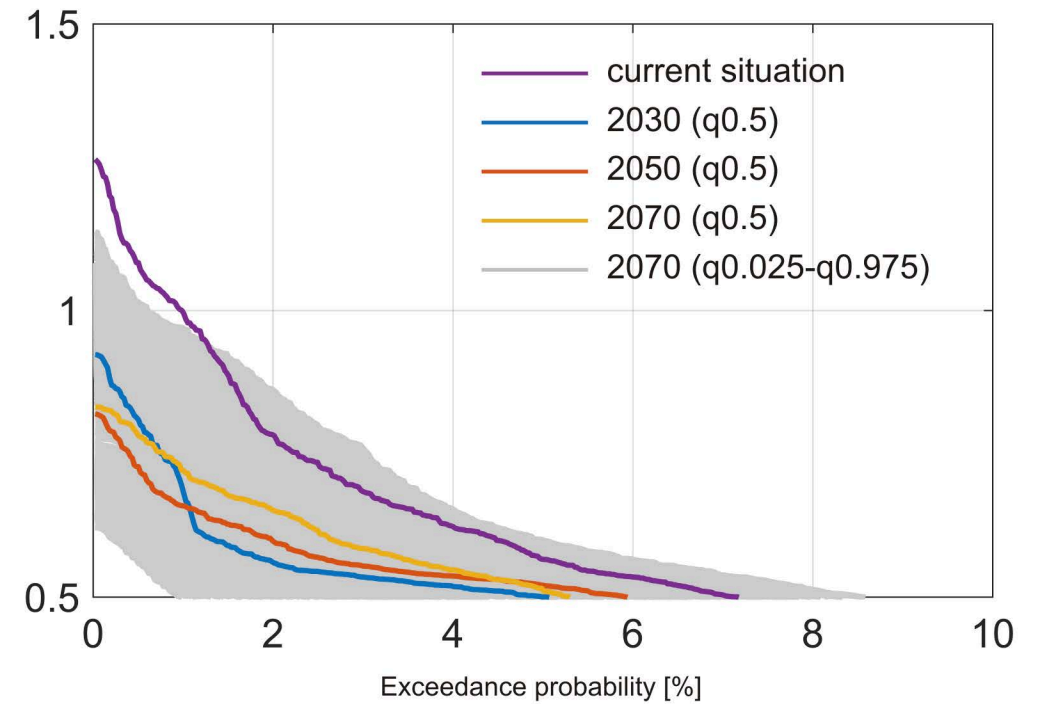

Fig. S2

Estimated FDC of QS [ $\text{m}^3/\text{s}$ ]

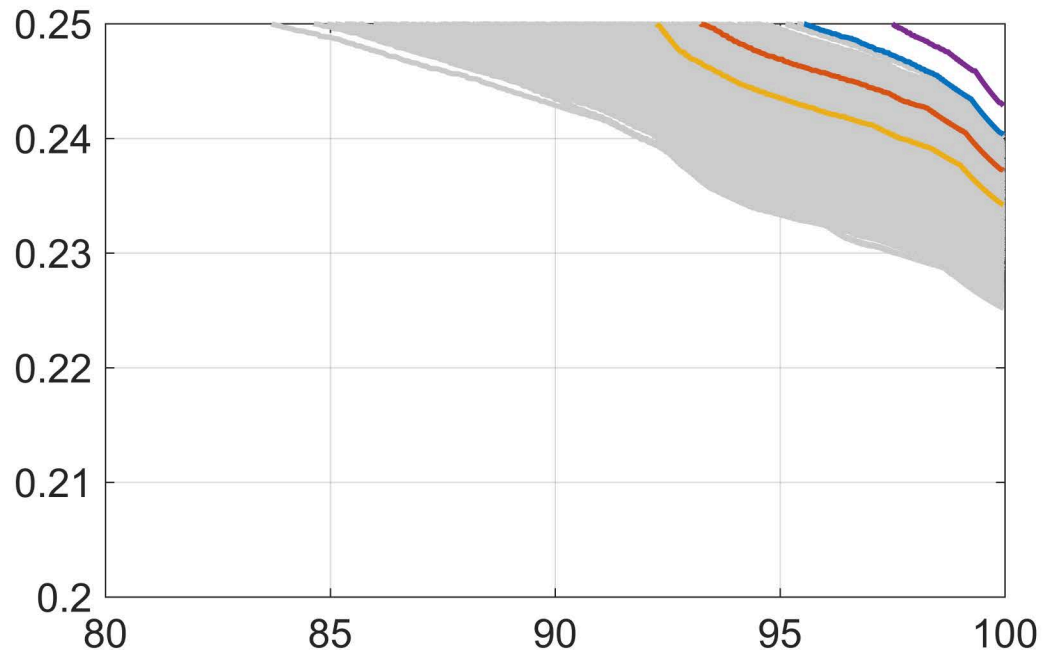

Estimated FDC of QA [ $\text{m}^3/\text{s}$ ]

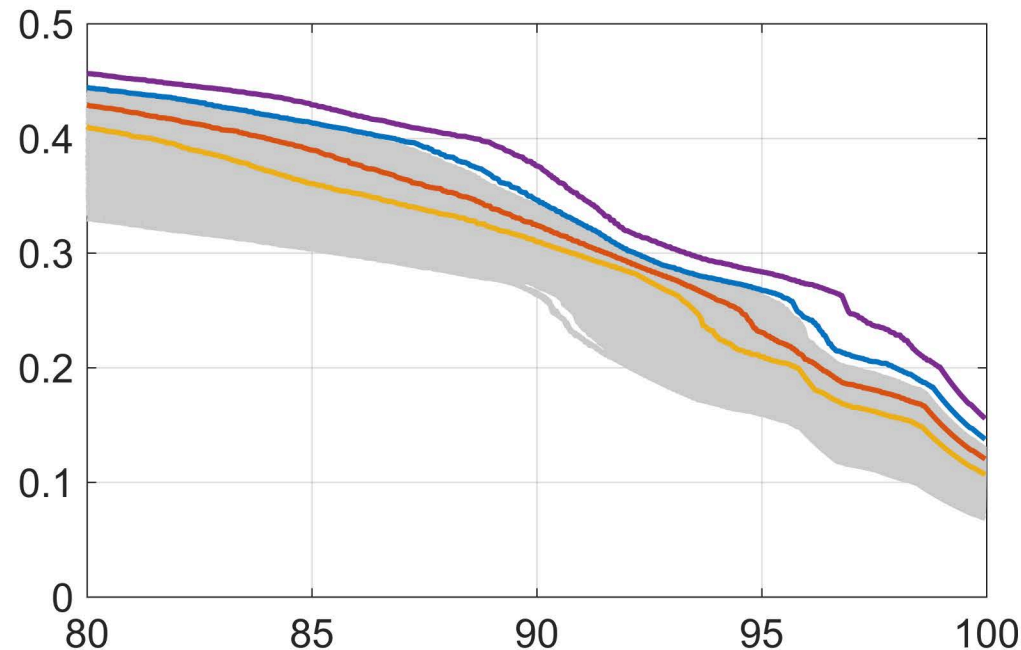

Estimated FDC of QE [ $\text{m}^3/\text{s}$ ]

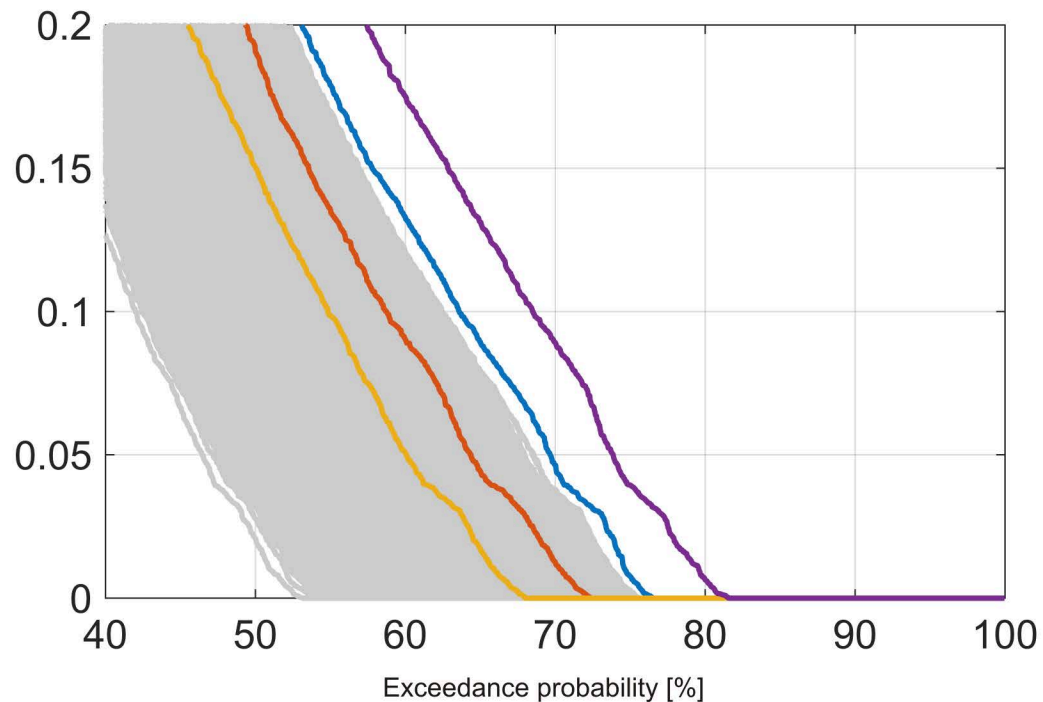

Estimated FDC of surface runoff [ $\text{m}^3/\text{s}$ ]

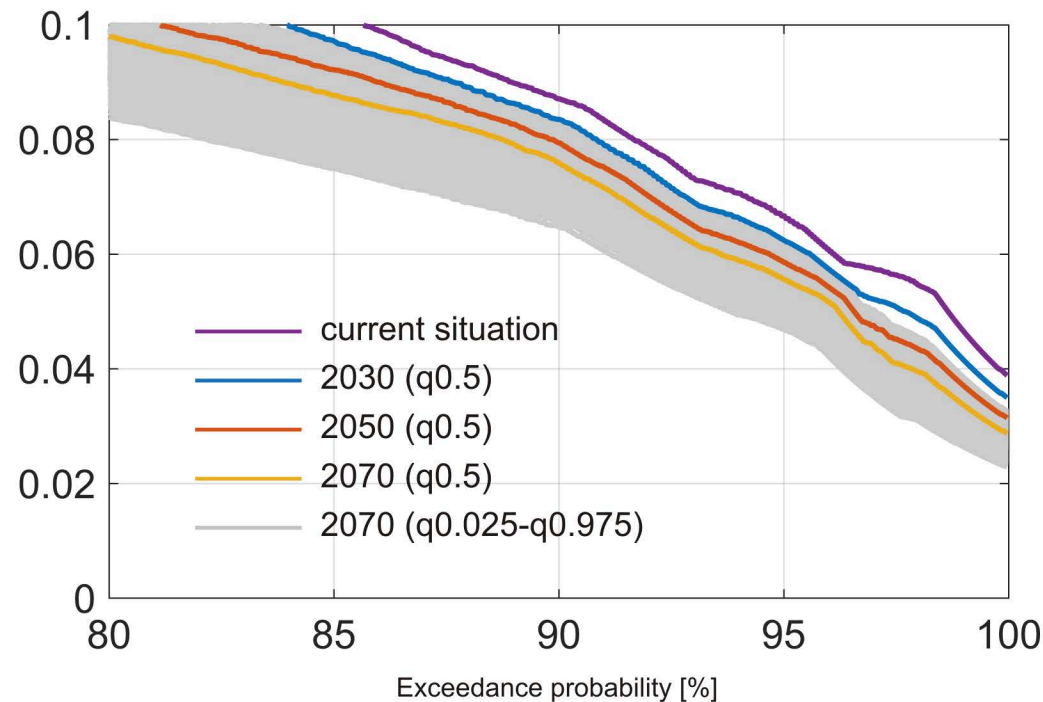

Table S1 Summary of calibrated model parameters.

| model domain     | model parameter | model location    | description                                                 | units                               | parameter range |          | final calibrated parameter set | model domain          | model parameter | model part   | description       | units | parameter range |       | final calibrated parameter set |      |
|------------------|-----------------|-------------------|-------------------------------------------------------------|-------------------------------------|-----------------|----------|--------------------------------|-----------------------|-----------------|--------------|-------------------|-------|-----------------|-------|--------------------------------|------|
|                  |                 |                   |                                                             |                                     | lower           | upper    |                                |                       |                 |              |                   |       | lower           | upper |                                |      |
| snow storage     | $x_1$           | sub. 1-29         | threshold temperature                                       | °C                                  | 0.00            | 6.00     | 1.95                           |                       | $x_{39}$        | C25          |                   |       | 2.00            | 4.00  | 3.46                           |      |
|                  | $x_2$           | sub. 1-29         | degree day factor                                           | mm h <sup>-1</sup> °C <sup>-1</sup> | 0.00            | 0.10     | 0.00                           |                       | $x_{40}$        | C26          |                   |       | 2.00            | 4.00  | 2.53                           |      |
|                  | $x_3$           | sub. 1-29         | refreezing factor                                           | -                                   | 0.00            | 0.50     | 0.37                           |                       | $x_{41}$        | C27          |                   |       | 0.60            | 1.00  | 0.86                           |      |
|                  | $x_4$           | sub. 1-29         | water holding capacity                                      | -                                   | 0.00            | 0.50     | 0.00                           |                       | $x_{42}$        | C28          |                   |       | 2.00            | 4.00  | 3.77                           |      |
|                  | $x_5$           | sub. 1-29         | radiation coefficient                                       | -                                   | 0.0002          | 0.0006   | 0.0002                         |                       | $x_{43}$        | C29          |                   |       | 0.60            | 1.00  | 0.76                           |      |
| unsaturated zone | $x_6$           | sub. 1-5          |                                                             |                                     | 0.00            | 0.50     | 0.26                           |                       | $x_{44}$        | C30          |                   |       | 2.00            | 4.00  | 2.92                           |      |
|                  | $x_7$           | sub. 6-10         |                                                             |                                     | 0.00            | 0.50     | 0.38                           |                       | $x_{45}$        | C31          | conduit diameter  | m     | 2.00            | 4.00  | 2.00                           |      |
|                  | $x_8$           | sub. 11-15        | infiltration threshold                                      | mm                                  | 0.00            | 0.50     | 0.29                           |                       | $x_{46}$        | C32          |                   |       | 2.00            | 4.00  | 2.51                           |      |
|                  | $x_9$           | sub. 16-20        |                                                             |                                     | 0.00            | 0.50     | 0.40                           |                       | $x_{47}$        | C33          |                   |       | 2.00            | 4.00  | 2.97                           |      |
|                  | $x_{10}$        | sub. 21-29        |                                                             |                                     | 0.00            | 0.50     | 0.50                           |                       | $x_{48}$        | C34          |                   |       | 0.20            | 2.00  | 0.51                           |      |
|                  | $x_{11}$        | sub. 1-5          | proportion of recharge distributed into fast flow reservoir |                                     |                 | 0.60     | 1.00                           | 0.60                  |                 | $x_{49}$     | C35               |       |                 | 0.20  | 2.00                           | 0.85 |
|                  | $x_{12}$        | sub. 6-10         |                                                             | %                                   | 0.60            | 1.00     | 1.00                           |                       | $x_{50}$        | C36          |                   |       | 0.20            | 2.00  | 0.20                           |      |
|                  | $x_{13}$        | sub. 11-15        |                                                             | 0.60                                | 1.00            | 0.64     |                                | $x_{51}$              | C37             |              |                   | 0.20  | 2.00            | 2.00  |                                |      |
|                  | $x_{14}$        | sub. 16-20        |                                                             | 0.60                                | 1.00            | 0.67     |                                | $x_{52}$              | C38             |              |                   | 0.20  | 2.00            | 0.21  |                                |      |
|                  | $x_{15}$        | sub. 1-5          |                                                             |                                     | 100             | 1500     | 959                            |                       | $x_{53}$        | C1-C5        |                   |       | 10              | 2000  | 1189                           |      |
|                  | $x_{16}$        | sub. 6-10         | effective flow width                                        |                                     | 100             | 1500     | 1500                           |                       | $x_{54}$        | C6-C10       |                   |       | 10              | 2000  | 2000                           |      |
|                  | $x_{17}$        | sub. 11-15        | for fast flow / surface                                     | m                                   | 100             | 1500     | 1008                           |                       | $x_{55}$        | C11-C15      |                   |       | 10              | 2000  | 1134                           |      |
|                  | $x_{18}$        | sub. 16-20        | runoff reservoir                                            |                                     | 100             | 1500     | 421                            |                       | $x_{56}$        | C16-C20      |                   |       | 10              | 2000  | 263                            |      |
|                  | $x_{19}$        | sub. 21-29        |                                                             |                                     | 100             | 1500     | 100                            |                       | $x_{57}$        | C21          |                   |       | 10              | 2000  | 1397                           |      |
| $x_{20}$         | sub. 1-20       | initial base flow | m <sup>3</sup> /s                                           | 0.26                                | 0.40            | 0.40     |                                | $x_{58}$              | C22             |              |                   | 10    | 2000            | 1011  |                                |      |
| drainage network | $x_{21}$        | N1                |                                                             |                                     | 1430            | 1450     | 1446                           |                       | $x_{59}$        | C23          |                   |       | 10              | 2000  | 10                             |      |
|                  | $x_{22}$        | N2                |                                                             |                                     | 1300            | 1320     | 1300                           |                       | $x_{60}$        | C24          |                   |       | 10              | 2000  | 1661                           |      |
|                  | $x_{23}$        | N3                |                                                             |                                     | 1280            | 1300     | 1280                           |                       | $x_{61}$        | C25          |                   |       | 10              | 2000  | 1304                           |      |
|                  | $x_{24}$        | N4                |                                                             |                                     | 1270            | 1290     | 1270                           |                       | $x_{62}$        | C26          |                   |       | 10              | 2000  | 756                            |      |
|                  | $x_{25}$        | N5                | junction elevation                                          | m asl                               | 1240            | 1260     | 1240                           |                       | $x_{63}$        | C27          | conduit roughness | mm    | 10              | 2000  | 1450                           |      |
|                  | $x_{26}$        | N6                |                                                             |                                     | 1210            | 1230     | 1210                           |                       | $x_{64}$        | C28          |                   |       | 10              | 2000  | 752                            |      |
|                  | $x_{27}$        | N7                |                                                             |                                     | 1120            | 1130     | 1127                           |                       | $x_{65}$        | C29          |                   |       | 10              | 2000  | 1782                           |      |
|                  | $x_{28}$        | N8                |                                                             |                                     | 1105            | 1115     | 1105                           |                       | $x_{66}$        | C30          |                   |       | 10              | 2000  | 1797                           |      |
|                  | $x_{29}$        | N9                |                                                             |                                     | 1095            | 1105     | 1098                           |                       | $x_{67}$        | C31          |                   |       | 10              | 2000  | 1577                           |      |
|                  | $x_{30}$        | N10               |                                                             |                                     | 1020            | 1035     | 1028                           |                       | $x_{68}$        | C32          |                   |       | 10              | 2000  | 2000                           |      |
|                  | $x_{31}$        | C1-C5             |                                                             |                                     | 2.00            | 4.00     | 2.88                           |                       | $x_{69}$        | C33          |                   |       | 10              | 2000  | 967                            |      |
|                  | $x_{32}$        | C6-C10            |                                                             |                                     | 2.00            | 4.00     | 2.00                           |                       | $x_{70}$        | C34          |                   |       | 10              | 2000  | 274                            |      |
|                  | $x_{33}$        | C11-C15           |                                                             |                                     | 2.00            | 4.00     | 2.81                           |                       | $x_{71}$        | C35          |                   |       | 10              | 2000  | 10                             |      |
|                  | $x_{34}$        | C16-C20           | conduit diameter                                            | m                                   | 2.00            | 4.00     | 4.00                           |                       | $x_{72}$        | C36          |                   |       | 10              | 2000  | 1273                           |      |
| $x_{35}$         | C21             | 2.00              |                                                             |                                     | 4.00            | 2.71     |                                | $x_{73}$              | C37             |              |                   | 10    | 2000            | 1753  |                                |      |
| $x_{36}$         | C22             | 2.00              |                                                             |                                     | 4.00            | 3.95     |                                | $x_{74}$              | C38             |              |                   | 10    | 2000            | 1451  |                                |      |
| $x_{37}$         | C23             | 2.00              |                                                             |                                     | 4.00            | 4.00     |                                | $x_{75}$              | Sc1-Sc5         | open channel |                   |       | 0.01            | 0.20  | 0.03                           |      |
| $x_{38}$         | C24             | 2.00              | 4.00                                                        | 4.00                                |                 | $x_{76}$ | Sc6-Sc11                       | roughness coefficient |                 |              | 0.01              | 0.20  | 0.08            |       |                                |      |
